# Supplementary material
Source: PubMed Central journal article supplement (PMC6354615)
Supplement: Supp_Fig1.pdf [file Supp_Fig1.pdf]

## Supplementary Data

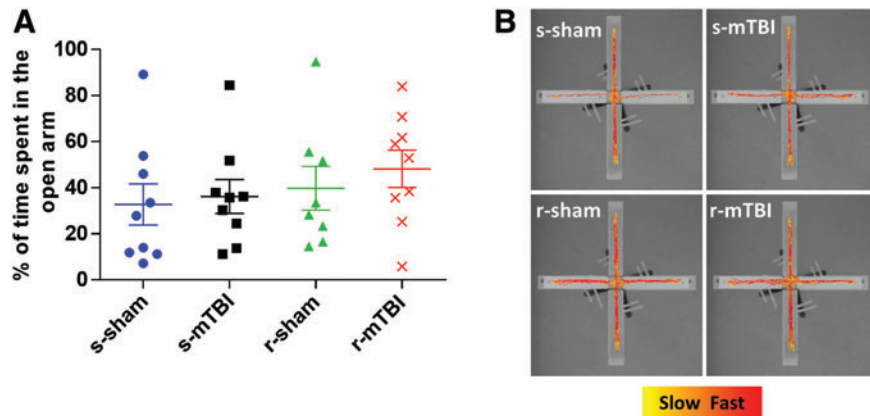

**SUPPLEMENTARY FIG. S1.** Evaluation of de/inhibition using the elevated plus maze at 12 month post mild traumatic brain injury (mTBI). **(A)** There was no difference in the amount of time spent in the open arm across all groups. **(B)** Representative tracks plot for each group. The velocity of each animal is represented by a color gradient from yellow (0 cm/sec) to red (15 cm/sec). Data are presented as mean  $\pm$  standard error of the mean.  $n=9$  per group.
