# Supplementary material
Source: PubMed Central journal article supplement (PMC6354615)
Supplement: Supp_Fig2.pdf [file Supp_Fig2.pdf]

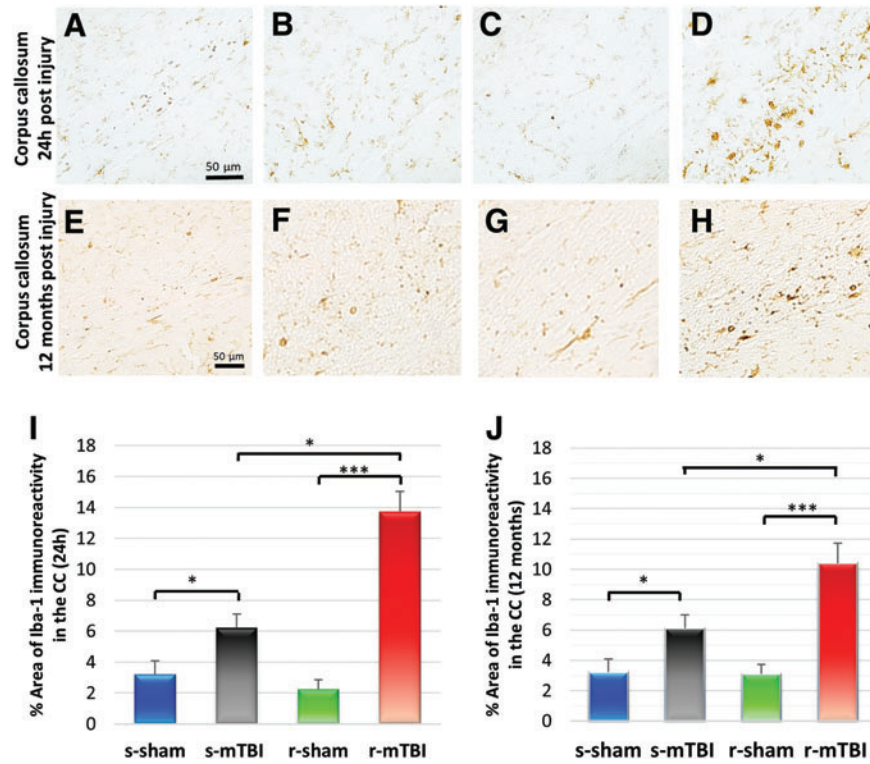

**SUPPLEMENTARY FIG. S2.** Immunohistochemical labeling for microglia with anti-Iba1. Sagittal section of the mouse brain at  $\pm 0.4$  mm lateral to midline in the corpus callosum (CC) at 24 h post last injury (A–D), and 12 months post last injury (E–H). There was no evidence of neuroinflammation in the hTau sham animals at any time point (I,J). In the single injury animals, both resting and activated microglia (with a bushy morphology) were observed at 24 h post-injury in the CC (s-mTBI  $6.22 \pm 0.9\%$  vs. s-sham  $3.22 \pm 0.9\%$ ;  $p < 0.05$ ; D,I). For mice that underwent r-mTBI, immunostaining for Iba-1 revealed clusters of activated microglia in the CC (r-mTBI  $13.7 \pm 1.3\%$  vs. r-sham  $2.21 \pm 0.6\%$ ;  $p < 0.0001$ ; s-mTBI  $6.22 \pm 0.9\%$  vs. r-mTBI  $13.7 \pm 1.3\%$ ;  $p < 0.05$ ; D,I). By 12 months post-injury, the single and r-mTBI showed increased microglial activity in the body of the CC when compared with corresponding shams (r-mTBI  $10.4 \pm 1.3\%$  vs. r-sham  $3.01 \pm 0.5\%$ ;  $p < 0.0001$ ; s-mTBI  $6.1 \pm 0.9\%$  vs. s-sham  $3.4 \pm 0.7\%$ ;  $p < 0.05$ ; F,H,J).
