# Supplementary material
Source: PubMed Central journal article supplement (PMC6354615)
Supplement: Supp_Fig3.pdf [file Supp_Fig3.pdf]

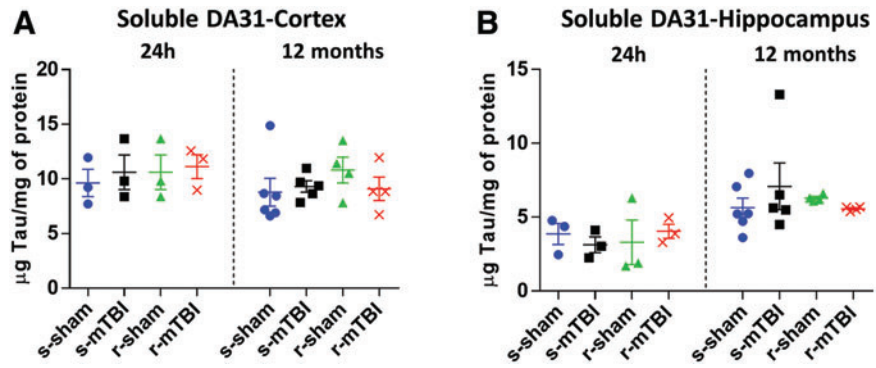

**SUPPLEMENTARY FIG. S3.** DA31 (total tau) enzyme-linked immunosorbent assays measuring the soluble tau level of each group at 24 h and 13 months post mild traumatic brain injury (mTBI)/anesthesia. One-way analysis of variance was used to calculate significance of tau in the cortex (**A**) and in the hippocampus (**B**) between the four groups for each time point. Each data point indicates an individual animal. No difference was observed between each group;  $p > 0.05$ .
